# Supplementary material
Source: PubMed Central journal article supplement (PMC2745594)
Supplement: NIHMS129497-supplement-1_si_001.pdf [file NIHMS129497-supplement-1_si_001.pdf]

### SPARC Plate Viewer

Screener: Terence Moy Experiment: 0022 Plate: AMP5\_A(3581) Row: C Column: 03 Submit



Well



All



Dead



|                |                     |
|----------------|---------------------|
| Well Location  | <a href="#">C03</a> |
| All Worm Area  | 11346               |
| Dead Worm Area | 2058                |
| Death Ratio    | 18.14%              |

Copyright©2009 Massachusetts General Hospital

Supplementary Figure 1. Data viewer web interface. The data viewer is connected to the Oracle database of images acquired in a screen, and output images and data from the automated CellProfiler analysis.

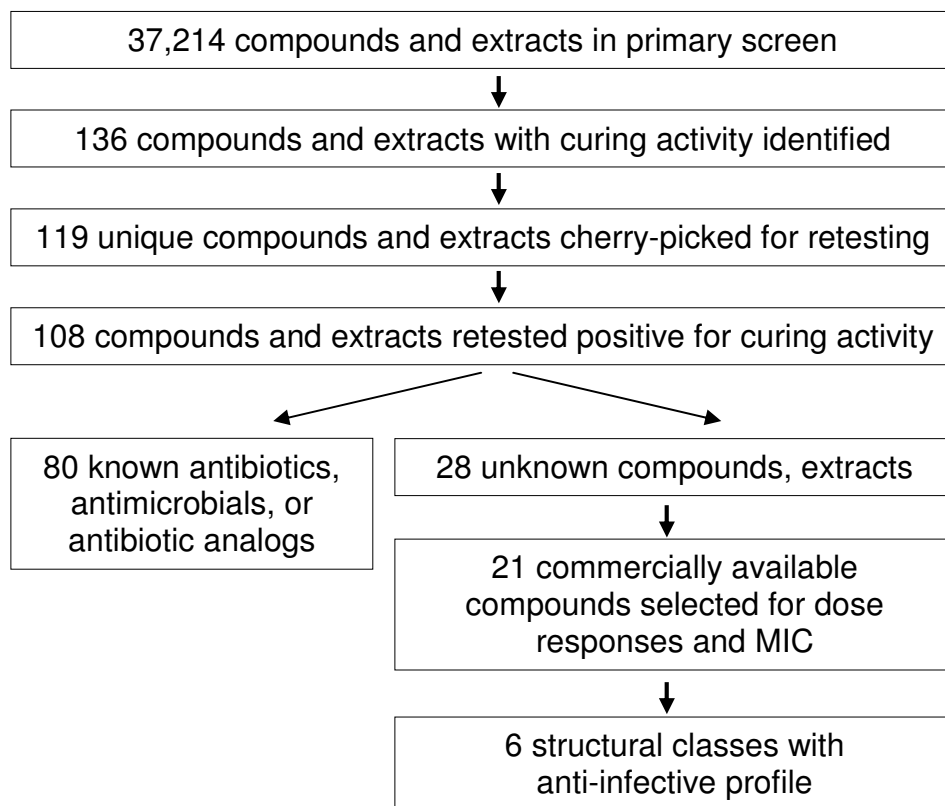

Supplementary Figure 2. Flow chart of the categorization of hit compounds.

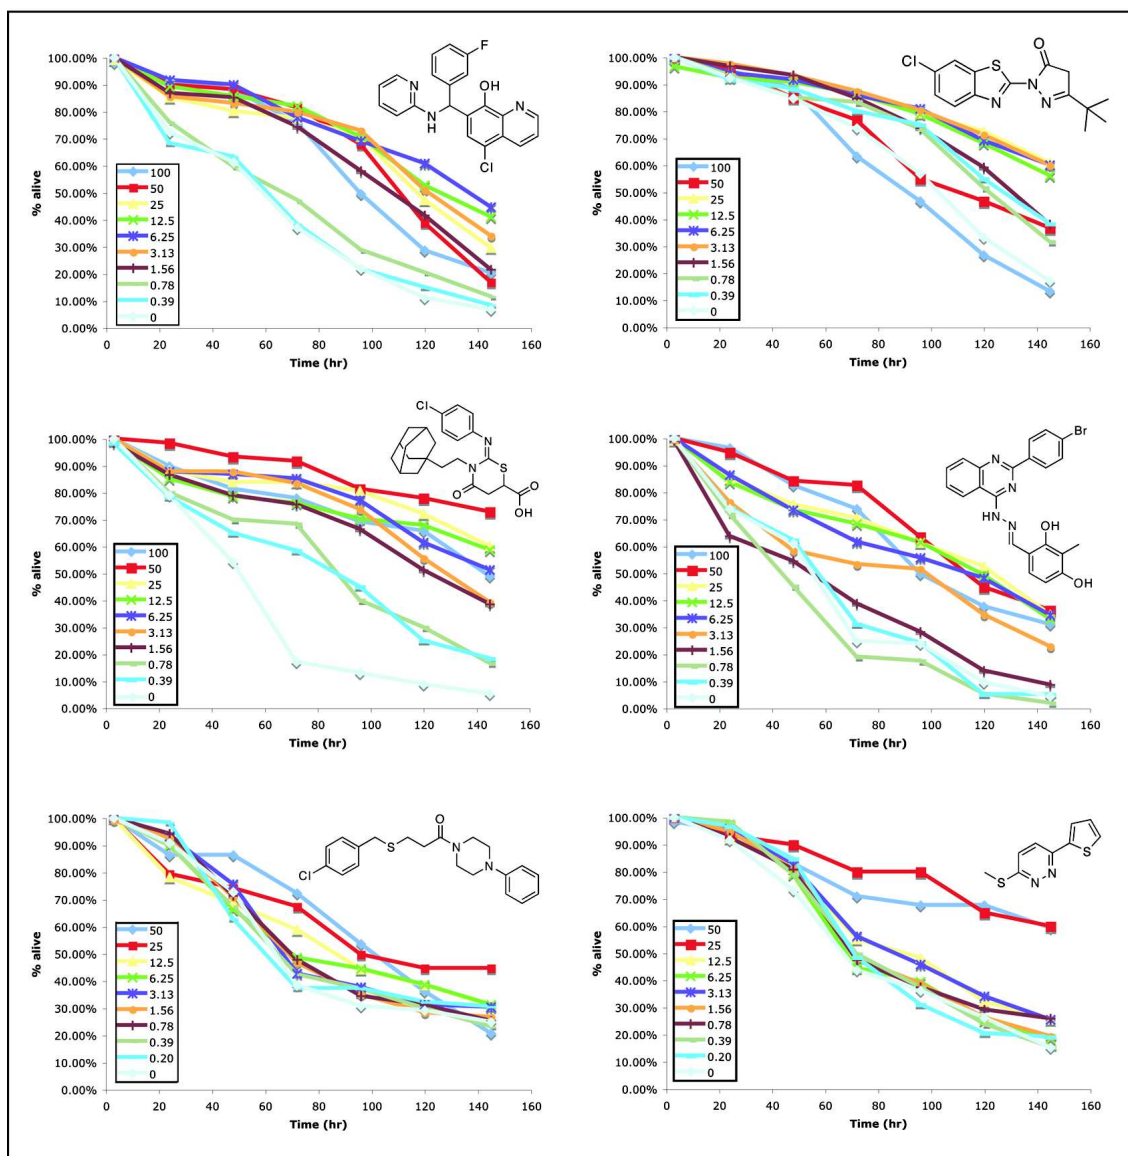

Supplementary Figure 3. Dose response curves of representative anti-infective compounds from each of the 6 structural groups. The compound structures are shown in the top right hand corner of the graphs. Each colored curve represents a survival curve at a different concentration ( $\mu\text{g/ml}$ ).

1

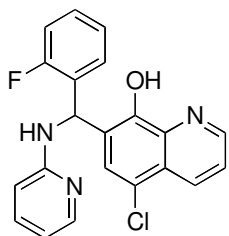

MIC=12.5  
EC=0.78

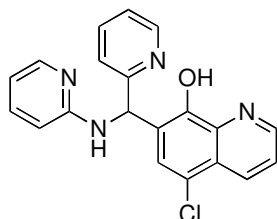

MIC=12.5  
EC=3.13

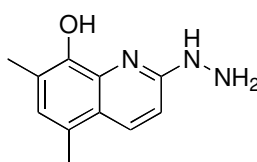

MIC=n.d.  
EC=n.d.

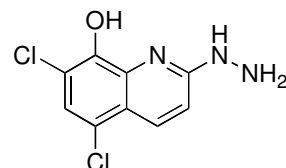

MIC=6.25  
EC=0.20

2

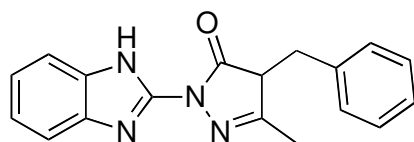

MIC=n.d.  
EC=n.d.

11

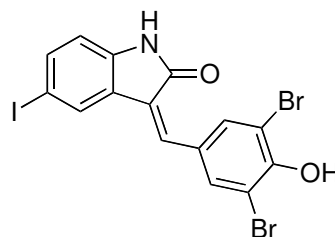

MIC=6.25  
EC=6.25

3

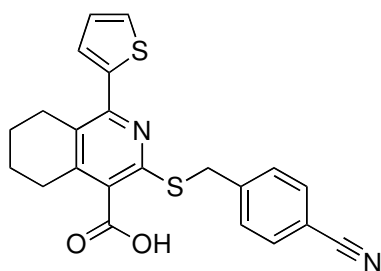

MIC=n.d.  
EC=n.d.

12

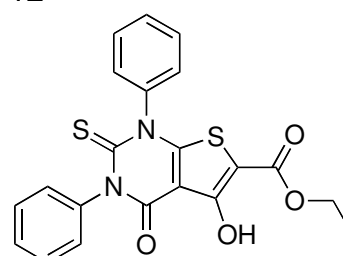

MIC<0.78  
EC=0.39

4

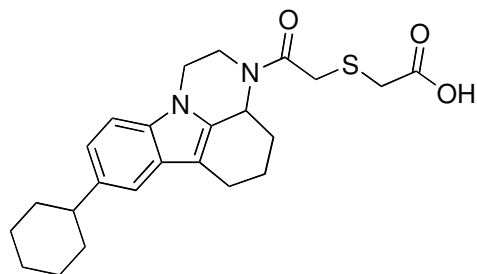

MIC=n.d.  
EC=n.d.

13

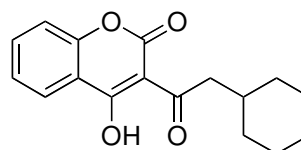

MIC<0.78  
EC=1.56

|                                                                                                                           |                                                                                                                             |
|---------------------------------------------------------------------------------------------------------------------------|-----------------------------------------------------------------------------------------------------------------------------|
| <p>7</p> 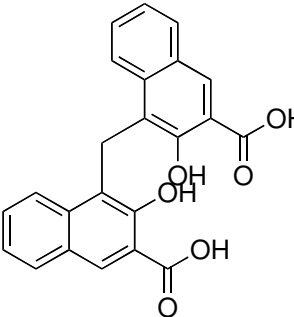 <p>MIC=25<br/>EC=6.25</p>      | <p>14</p>  <p>MIC=6.25<br/>EC=4.17</p>   |
| <p>8</p>  <p>MIC&lt;0.78<br/>EC=6.25</p> | <p>15</p>  <p>MIC=n.d.<br/>EC=n.d.</p>   |
| <p>9</p>  <p>MIC=n.d.<br/>EC=n.d.</p>   | <p>16</p>  <p>MIC=n.d.<br/>EC=n.d.</p>  |
| <p>10</p>  <p>MIC&lt;0.78, EC=0.78</p> | <p>17</p>  <p>MIC=n.d.<br/>EC=n.d.</p> |

Supplementary Figure 4. Compound structures, MIC and minimum EC values of all non-antimicrobial hits excluding those shown in Table 2. The structures are presented in structural groups.

## Supplementary Method 1. CellProfiler Pipeline

### Module #1: LoadImages

How do you want to load these files? Text-Regular expressions  
Type the text that one type of image has in common (for TEXT options), or their position in each group (for ORDER option): `_w2[^_][^t]`  
What do you want to call these images within CellProfiler? RawBrightfield  
Type the text that one type of image has in common (for TEXT options), or their position in each group (for ORDER option): `_w1[6_][^t]`  
What do you want to call these images within CellProfiler? RawSYTOX  
If using ORDER, how many images are there in each group? 3  
Are you loading image or movie files? Image  
Analyze all subfolders within the selected folder? Yes  
Enter the path name to the folder where the images to be loaded are located. Type period (.) for default image folder.

### Module #2: RescaleIntensity

What did you call the image to be rescaled? RescaledBrightfield  
What do you want to call the rescaled image? RescaledBrightfield  
Rescaling method. (S) Stretch 0 to 1

### Module #3: IdentifyPrimAutomatic

What did you call the images you want to process? RescaledBrightfield  
What do you want to call the objects identified by this module? WellArea  
Typical diameter of objects, in pixel units (Min,Max): 100,1000  
Discard objects outside the diameter range? Yes  
Try to merge too small objects with nearby larger objects? No  
Discard objects touching the border of the image? No  
Select an automatic thresholding method or enter an absolute threshold in the range [0,1]. Otsu Global  
Threshold correction factor 1  
Lower and upper bounds on threshold, in the range [0,1] 0,1  
Speed up by using lower-resolution image to find local maxima? (if you are distinguishing between clumped objects)  
Yes  
Do you want to fill holes in identified objects? Yes  
Do you want to run in test mode where each method for distinguishing clumped objects is compared? No

### Module #4: ExpandOrShrink

What did you call the objects that you want to expand or shrink? WellArea  
What do you want to call the expanded or shrunken objects? ShrunkenWell  
Were the objects identified using an Identify Primary or Identify Secondary module (note: shrinking results are not perfect with Secondary objects)? Primary  
Do you want to expand or shrink the objects? Shrink  
Enter the number of pixels by which to expand or shrink the objects, or "Inf" to either shrink to a point or expand until almost touching, or 0 (the number zero) to simply add partial dividing lines between objects that are touching (experimental feature). 5  
What do you want to call the outlines of the identified objects (optional)? WellOutline

### Module #5: CorrectIllumination Calculate

What did you call the images to be used to calculate the illumination function? RescaledBrightfield  
What do you want to call the illumination function? w2illum2  
Do you want to calculate using regular intensities or background intensities? Regular  
For REGULAR INTENSITY: If the incoming images are binary and you want to dilate each object in the final averaged image, enter the radius (roughly equal to the original radius of the objects). Otherwise, enter 0. 0  
For BACKGROUND INTENSITY: Enter the block size, which should be large enough that every square block of pixels is likely to contain some background pixels, where no objects are located. 45  
Do you want to rescale the illumination function so that the pixel intensities are all equal to or greater than one (Y or N)? This is recommended if you plan to use the division option in CorrectIllumination\_Apply so that the resulting images will be in the range 0 to 1. Yes  
Enter Each to calculate an illumination function for Each image individually (in which case, choose Pipeline mode in the next box) or All to calculate an illumination function based on All the specified images to be corrected. See the help for details. Each

Are the images you want to use to calculate the illumination function to be loaded straight from a Load Images module, or are they being produced by the pipeline? See the help for details. Pipeline

Enter the smoothing method you would like to use, if any. Median Filtering

For MEDIAN FILTERING, SUM OF SQUARES, or SQUARE OF SUMS, specify the approximate width of the artifacts to be smoothed (in pixels), or leave the word "Automatic". 200

If you want override the above width of artifacts and set your own filter size (in pixels), please specify it here. Otherwise leave "". /

(For "All" mode only) What do you want to call the averaged image (prior to dilation or smoothing)? (This is an image produced during the calculations - it is typically not needed for downstream modules) Do not save

What do you want to call the image after dilation but prior to smoothing? (This is an image produced during the calculations - it is typically not needed for downstream modules) Do not save

#### Module #6: CorrectIllumination

What did you call the image to be corrected? RescaledBrightfield

What do you want to call the corrected image? CorrBrightfield

What did you call the illumination correction function image to be used to carry out the correction (produced by another module or loaded as a .mat format image using Load Single Image)? w2illum2

How do you want to apply the illumination correction function? Divide

If you chose division, Choose rescaling method. Stretch 0 to 1

#### Module #7: InvertIntensity

What did you call the image to be inverted (made negative)? CorrBrightfield

What do you want to call the inverted image? InvertedBrightfield

#### Module #8: Crop

What did you call the image to be cropped? InvertedBrightfield

What do you want to call the cropped image? Brightfield

For RECTANGLE + ELLIPSE, into which shape would you like to crop? See the help for several other options. ShrunkenWell

Would you like to crop by typing in pixel coordinates or clicking with the mouse? Coordinates

Should the cropping pattern in the first image cycle be applied to all subsequent image cycles (First option) or should each image cycle be cropped individually? Individually

For COORDINATES + FIRST + RECTANGLE, specify the (Left, Right) pixel positions (the word "end" can be substituted for right pixel if you do not want to crop the right edge) 1,100

For COORDINATES + FIRST + RECTANGLE, specify the (Top, Bottom) pixel positions (the word "end" can be substituted for bottom pixel if you do not want to crop the bottom edge) 1,100

For COORDINATES + FIRST + ELLIPSE, what is the center pixel position of the ellipse in form X,Y? 500,500

For COORDINATES + FIRST + ELLIPSE, what is the radius of the ellipse in the X direction? 400

For COORDINATES + FIRST + ELLIPSE, what is the radius of the ellipse in the Y direction? 200

Do you want to use Plate Fix? (see Help, only used when cropping based on previously identified objects) No

#### Module #9: IdentifyPrimAutomatic

What did you call the images you want to process? Brightfield

What do you want to call the objects identified by this module? Worms

Typical diameter of objects, in pixel units (Min,Max): 13,200

Discard objects outside the diameter range? Yes

Try to merge too small objects with nearby larger objects? Yes

Discard objects touching the border of the image? No

Select an automatic thresholding method or enter an absolute threshold in the range [0,1]. To choose a binary image, select "Other" and type its name. Choosing "All" will use the Otsu Global method to calculate a single threshold for the entire image group. The other methods calculate a threshold for each image individually. "Set interactively" will allow you to manually adjust the threshold during the first cycle to determine what will work well. RobustBackground Global

Threshold correction factor 1

Lower and upper bounds on threshold, in the range [0,1] 0,1

For MoG thresholding, what is the approximate percentage of image covered by objects? 10 Method to distinguish clumped objects (see help for details): None

Method to draw dividing lines between clumped objects (see help for details): None

Size of smoothing filter, in pixel units (if you are distinguishing between clumped objects). Enter 0 for low resolution images with small objects (~< 5 pixel diameter) to prevent any image smoothing. Automatic

Suppress local maxima within this distance, (a positive integer, in pixel units) (if you are distinguishing between clumped objects) Automatic

Speed up by using lower-resolution image to find local maxima? (if you are distinguishing between clumped objects) Yes

Enter the following information, separated by commas, if you would like to use the Laplacian of Gaussian method for identifying objects instead of using the above settings: Size of neighborhood(height,width),Sigma,Minimum Area,Size of Weiner Filter(height,width),Threshold /

What do you want to call the outlines of the identified objects (optional)? Do not save

Do you want to fill holes in identified objects? No

Do you want to run in test mode where each method for distinguishing clumped objects is compared? No

#### Module #10: ConvertToImage

What did you call the objects you want to convert to an image? Worms  
What do you want to call the resulting image? WormImage  
What colors should the resulting image use? Binary (black & white)  
For COLOR, what do you want the colormap to be? Default

#### Module #11: MeasureImageAreaOccupied

What did you call the images you want to process? WormImage  
What do you want to call the staining measured by this module? WormArea  
Select an automatic thresholding method or enter an absolute threshold in the range [0,1]. Choosing "All" will use the Otsu Global method to calculate a single threshold for the entire image group. The other methods calculate a threshold for each image individually. Set interactively will allow you to manually adjust the threshold to determine what will work well.  
.5  
Threshold correction factor 1  
Lower and upper bounds on threshold, in the range [0,1] 0,1  
For MoG thresholding, what is the approximate percentage of image covered by objects? 10

#### Module #12: SaveImages revision - 12

What did you call the images you want to save? If you would like to save an entire figure, enter the module number here WormImage  
Which images' original filenames do you want use as a base for these new images' filenames? Your choice MUST be images loaded directly with a Load module. Alternately, type N to use sequential numbers for the file names, or type =DesiredFilename to use the single file name you specify (replace DesiredFilename with the name you actually want) for all files (this is \*required\* when saving an avi movie). RawBrightfield  
Enter text to append to the image name, type N to use sequential numbers, or leave "" to not append anything. ALL  
In what file format do you want to save images (figures must be saved as fig, which is only openable in Matlab)? jpg  
Enter the pathname to the directory where you want to save the images. Type period (.) for default output directory.  
Enter the bit depth at which to save the images (Note: some image formats do not support saving at a bit depth of 12 or 16; see Matlab's imwrite function for more details.) 8  
Do you want to always check whether you will be overwriting a file when saving images? No  
At what point in the pipeline do you want to save the image? When saving in avi (movie) format, choose Every cycle.  
Every cycle  
If you are saving in avi (movie) format, do you want to save the movie only after the last cycle is processed (enter "L"), or after every Nth cycle (1,2,3...)? Saving movies is time-consuming. See the help for this module for more details. L  
Do you want to rescale the images to use a full 8 bit (256 graylevel) dynamic range (Y or N)? Use the RescaleIntensity module for other rescaling options. No  
For grayscale images, specify the colormap to use (see help). This is critical for movie (avi) files. Choosing anything other than gray may degrade image quality or result in image stretching. gray  
Enter any optional parameters here ("Quality",1 or "Quality",100 etc.) or leave / for no optional parameters. /  
Update file names within CellProfiler? See help for details. No  
Warning! It is possible to overwrite existing files using this module! n/a

#### Module #13: RescaleIntensity

What did you call the image to be rescaled? RawSYTOX  
What do you want to call the rescaled image? ScaledSYTOX  
Rescaling method. (S) Stretch the image (0 to 1). (E) Enter the minimum and maximum values in the boxes below. (G) rescale so all pixels are equal to or Greater than one. (M) Match the maximum of one image to the maximum of another. (C) Convert to 8 bit. See the help for details. Enter min/max below  
(Method E only): Enter the intensity from the original image that should be set to the lowest value in the rescaled image, or type AA to calculate the lowest intensity automatically from all of the images to be analyzed and AE to calculate the lowest intensity from each image independently. 0  
(Method E only): Enter the intensity from the original image that should be set to the highest value in the rescaled image, or type AA to calculate the highest intensity automatically from all of the images to be analyzed and AE to calculate the highest intensity from each image independently. .0625  
(Method E only): What should the lowest intensity of the rescaled image be (range [0,1])? 0  
(Method E only): What should the highest intensity of the rescaled image be (range [0,1])? 1  
(Method M only): What did you call the image whose maximum you want the rescaled image to match?  
RawBrightfield

#### Module #14: Crop revision

What did you call the image to be cropped? ScaledSYTOX  
What do you want to call the cropped image? SYTOX  
For RECTANGLE + ELLIPSE, into which shape would you like to crop? See the help for several other options.  
ShrunkenWell  
Would you like to crop by typing in pixel coordinates or clicking with the mouse? Coordinates  
Should the cropping pattern in the first image cycle be applied to all subsequent image cycles (First option) or should each image cycle be cropped individually? Individually  
For COORDINATES + FIRST + RECTANGLE, specify the (Left, Right) pixel positions (the word "end" can be substituted for right pixel if you do not want to crop the right edge) 1,100  
For COORDINATES + FIRST + RECTANGLE, specify the (Top, Bottom) pixel positions (the word "end" can be substituted for bottom pixel if you do not want to crop the bottom edge) 1,100



For COORDINATES + FIRST + ELLIPSE, what is the center pixel position of the ellipse in form X,Y? 500,500  
For COORDINATES + FIRST + ELLIPSE, what is the radius of the ellipse in the X direction? 400  
For COORDINATES + FIRST + ELLIPSE, what is the radius of the ellipse in the Y direction? 200  
Do you want to use Plate Fix? (see Help, only used when cropping based on previously identified objects) No

#### Module #15: IdentifyPrimAutomatic

What did you call the images you want to process? SYTOX  
What do you want to call the objects identified by this module? DeadWorms  
Typical diameter of objects, in pixel units (Min,Max): 13,200  
Discard objects outside the diameter range? Yes  
Try to merge too small objects with nearby larger objects? Yes  
Discard objects touching the border of the image? No  
Select an automatic thresholding method or enter an absolute threshold in the range [0,1]. To choose a binary image, select "Other" and type its name. Choosing "All" will use the Otsu Global method to calculate a single threshold for the entire image group. The other methods calculate a threshold for each image individually. "Set interactively" will allow you to manually adjust the threshold during the first cycle to determine what will work well. Otsu Global  
Threshold correction factor .8  
Lower and upper bounds on threshold, in the range [0,1] 0.03,1  
For MoG thresholding, what is the approximate percentage of image covered by objects? 10 Method to distinguish clumped objects (see help for details): None  
Method to draw dividing lines between clumped objects (see help for details): None  
Size of smoothing filter, in pixel units (if you are distinguishing between clumped objects). Enter 0 for low resolution images with small objects (~< 5 pixel diameter) to prevent any image smoothing. Automatic  
Suppress local maxima within this distance, (a positive integer, in pixel units) (if you are distinguishing between clumped objects) Automatic  
Speed up by using lower-resolution image to find local maxima? (if you are distinguishing between clumped objects) Yes  
Enter the following information, separated by commas, if you would like to use the Laplacian of Gaussian method for identifying objects instead of using the above settings: Size of neighborhood(height,width),Sigma,Minimum Area,Size for Weiner Filter(height,width),Threshold /  
What do you want to call the outlines of the identified objects (optional)? Do not save  
Do you want to fill holes in identified objects? No  
Do you want to run in test mode where each method for distinguishing clumped objects is compared? No

#### Module #16: MeasureObjectAreaShape

What did you call the objects that you want to measure? DeadWorms  
Would you like to calculate the Zernike features for each object (with lots of objects, this can be very slow)? No

#### Module #17: MeasureObjectIntensity

What did you call the greyscale images you want to measure? SYTOX  
What did you call the objects that you want to measure? DeadWorms

#### Module #18: ConvertToImage

What did you call the objects you want to convert to an image? DeadWorms  
What do you want to call the resulting image? DeadWormImage  
What colors should the resulting image use? Binary (black & white)  
For COLOR, what do you want the colormap to be? Default

#### Module #19: MeasureImageAreaOccupied

What did you call the images you want to process? DeadWormImage  
What do you want to call the staining measured by this module? DeadWormArea  
Select an automatic thresholding method or enter an absolute threshold in the range [0,1]. Choosing "All" will use the Otsu Global method to calculate a single threshold for the entire image group. The other methods calculate a threshold for each image individually. Set interactively will allow you to manually adjust the threshold to determine what will work well.  
.5

Threshold correction factor 1  
Lower and upper bounds on threshold, in the range [0,1] 0,1  
For MoG thresholding, what is the approximate percentage of image covered by objects? 10

#### Module #20: SaveImages revision - 12

What did you call the images you want to save? If you would like to save an entire figure, enter the module number here DeadWormImage  
Which images' original filenames do you want use as a base for these new images' filenames? Your choice MUST be images loaded directly with a Load module. Alternately, type N to use sequential numbers for the file names, or type =DesiredFilename to use the single file name you specify (replace DesiredFilename with the name you actually want) for all files (this is \*required\* when saving an avi movie). RawSYTOX  
Enter text to append to the image name, type N to use sequential numbers, or leave "" to not append anything.  
DEAD

In what file format do you want to save images (figures must be saved as fig, which is only openable in Matlab)? jpg  
Enter the pathname to the directory where you want to save the images. Type period (.) for default output directory. .

Enter the bit depth at which to save the images (Note: some image formats do not support saving at a bit depth of 12 or 16; see Matlab's imwrite function for more details.) 8

Do you want to always check whether you will be overwriting a file when saving images? No

At what point in the pipeline do you want to save the image? When saving in avi (movie) format, choose Every cycle.  
Every cycle

If you are saving in avi (movie) format, do you want to save the movie only after the last cycle is processed (enter "L"), or after every Nth cycle (1,2,3...)? Saving movies is time-consuming. See the help for this module for more details. L

Do you want to rescale the images to use a full 8 bit (256 graylevel) dynamic range (Y or N)? Use the RescaleIntensity module for other rescaling options. No

For grayscale images, specify the colormap to use (see help). This is critical for movie (avi) files. Choosing anything other than gray may degrade image quality or result in image stretching. gray

Enter any optional parameters here ("Quality",1 or "Quality",100 etc.) or leave / for no optional parameters. /

Update file names within CellProfiler? See help for details. No

Warning! It is possible to overwrite existing files using this module! n/a

#### Module #21: Subtract

Subtract this image: WormImage

From this image: DeadWormImage

What do you want to call the resulting image? SubtractTotalfrDead

Enter the factor to multiply the first image by before subtracting: 1

Enter the factor to multiply the second image by before subtracting: 1

Do you want negative values in the image to be set to zero? Yes

#### Module #22: Subtract

Subtract this image: SubtractTotalfrDead

From this image: DeadWormImage

What do you want to call the resulting image? SubtractedDeadFinal

Enter the factor to multiply the first image by before subtracting: 1

Enter the factor to multiply the second image by before subtracting: 1

Do you want negative values in the image to be set to zero? Yes

#### Module #23: MeasureImageAreaOccupied

What did you call the images you want to process? SubtractedDeadFinal

What do you want to call the staining measured by this module? SubtrDeadWorms

Select an automatic thresholding method or enter an absolute threshold in the range [0,1]. Choosing "All" will use the Otsu Global method to calculate a single threshold for the entire image group. The other methods calculate a threshold for each image individually. Set interactively will allow you to manually adjust the threshold to determine what will work well.  
0.5

Threshold correction factor 1

Lower and upper bounds on threshold, in the range [0,1] 0,1

For MoG thresholding, what is the approximate percentage of image covered by objects? 10

#### Module #24: SaveImages revision - 12

What did you call the images you want to save? If you would like to save an entire figure, enter the module number here SubtractedDeadFinal

Which images' original filenames do you want use as a base for these new images' filenames? Your choice MUST be images loaded directly with a Load module. Alternately, type N to use sequential numbers for the file names, or type =DesiredFilename to use the single file name you specify (replace DesiredFilename with the name you actually want) for all files (this is \*required\* when saving an avi movie). RawSYTOX

Enter text to append to the image name, type N to use sequential numbers, or leave "" to not append anything.

SUBTRD

In what file format do you want to save images (figures must be saved as fig, which is only openable in Matlab)? jpg

Enter the pathname to the directory where you want to save the images. Type period (.) for default output directory. .

Enter the bit depth at which to save the images (Note: some image formats do not support saving at a bit depth of 12 or 16; see Matlab's imwrite function for more details.) 8

Do you want to always check whether you will be overwriting a file when saving images? Yes

At what point in the pipeline do you want to save the image? When saving in avi (movie) format, choose Every cycle.  
Every cycle

If you are saving in avi (movie) format, do you want to save the movie only after the last cycle is processed (enter "L"), or after every Nth cycle (1,2,3...)? Saving movies is time-consuming. See the help for this module for more details. L

Do you want to rescale the images to use a full 8 bit (256 graylevel) dynamic range (Y or N)? Use the RescaleIntensity module for other rescaling options. No

For grayscale images, specify the colormap to use (see help). This is critical for movie (avi) files. Choosing anything other than gray may degrade image quality or result in image stretching. gray

Enter any optional parameters here ("Quality",1 or "Quality",100 etc.) or leave / for no optional parameters. /

Update file names within CellProfiler? See help for details. No

Warning! It is possible to overwrite existing files using this module! n/a

#### Module #25: OverlayOutlines

On which image would you like to display the outlines? RescaledBrightfield

What did you call the outlines that you would like to display? WellOutline

Would you like to set the intensity (brightness) of the outlines to be the same as the brightest point in the image, or the maximum possible value for this image format? Max of image  
What do you want to call the image with the outlines displayed? WellBrightfield  
For color images, what do you want the color of the outlines to be? White

#### Module #26: OverlayOutlines

On which image would you like to display the outlines? ScaledSYTOX  
What did you call the outlines that you would like to display? WellOutline  
Would you like to set the intensity (brightness) of the outlines to be the same as the brightest point in the image, or the maximum possible value for this image format? Max of image  
What do you want to call the image with the outlines displayed? WellSYTOX  
For color images, what do you want the color of the outlines to be? White

#### Module #27: SaveImages

What did you call the images you want to save? If you would like to save an entire figure, enter the module number here WellBrightfield  
Which images' original filenames do you want use as a base for these new images' filenames? Your choice MUST be images loaded directly with a Load module. Alternately, type N to use sequential numbers for the file names, or type =DesiredFilename to use the single file name you specify (replace DesiredFilename with the name you actually want) for all files (this is \*required\* when saving an avi movie). RawBrightfield  
Enter text to append to the image name, type N to use sequential numbers, or leave "" to not append anything.  
WELL  
In what file format do you want to save images (figures must be saved as fig, which is only openable in Matlab)? jpg  
Enter the pathname to the directory where you want to save the images. Type period (.) for default output directory.  
Enter the bit depth at which to save the images (Note: some image formats do not support saving at a bit depth of 12 or 16; see Matlab's imwrite function for more details.) 8  
Do you want to always check whether you will be overwriting a file when saving images? No  
At what point in the pipeline do you want to save the image? When saving in avi (movie) format, choose Every cycle.  
Every cycle  
If you are saving in avi (movie) format, do you want to save the movie only after the last cycle is processed (enter "L"), or after every Nth cycle (1,2,3...)? Saving movies is time-consuming. See the help for this module for more details. L  
Do you want to rescale the images to use a full 8 bit (256 graylevel) dynamic range (Y or N)? Use the RescaleIntensity module for other rescaling options. No  
For grayscale images, specify the colormap to use (see help). This is critical for movie (avi) files. Choosing anything other than gray may degrade image quality or result in image stretching. gray  
Enter any optional parameters here ("Quality",1 or "Quality",100 etc.) or leave / for no optional parameters. /  
Update file names within CellProfiler? See help for details. No  
Warning! It is possible to overwrite existing files using this module! n/a

#### Module #28: SaveImages

What did you call the images you want to save? If you would like to save an entire figure, enter the module number here WellSYTOX  
Which images' original filenames do you want use as a base for these new images' filenames? Your choice MUST be images loaded directly with a Load module. Alternately, type N to use sequential numbers for the file names, or type =DesiredFilename to use the single file name you specify (replace DesiredFilename with the name you actually want) for all files (this is \*required\* when saving an avi movie). RawSYTOX  
Enter text to append to the image name, type N to use sequential numbers, or leave "" to not append anything.  
WELL1  
In what file format do you want to save images (figures must be saved as fig, which is only openable in Matlab)? jpg  
Enter the pathname to the directory where you want to save the images. Type period (.) for default output directory.  
Enter the bit depth at which to save the images (Note: some image formats do not support saving at a bit depth of 12 or 16; see Matlab's imwrite function for more details.) 8  
Do you want to always check whether you will be overwriting a file when saving images? No  
At what point in the pipeline do you want to save the image? When saving in avi (movie) format, choose Every cycle.  
Every cycle  
If you are saving in avi (movie) format, do you want to save the movie only after the last cycle is processed (enter "L"), or after every Nth cycle (1,2,3...)? Saving movies is time-consuming. See the help for this module for more details. L  
Do you want to rescale the images to use a full 8 bit (256 graylevel) dynamic range (Y or N)? Use the RescaleIntensity module for other rescaling options. No  
For grayscale images, specify the colormap to use (see help). This is critical for movie (avi) files. Choosing anything other than gray may degrade image quality or result in image stretching. gray  
Enter any optional parameters here ("Quality",1 or "Quality",100 etc.) or leave / for no optional parameters. /  
Update file names within CellProfiler? See help for details. No  
Warning! It is possible to overwrite existing files using this module! n/a

#### Module #29: CalculateRatios

What do you want to call the ratio calculated by this module? RatioDeadtoTotal  
Which object would you like to use for the numerator? Image  
Which category of measurements would you like to use? AreaOccupied\_SubtrDeadWorms  
Which feature do you want to use? (Enter the feature number - see help for details) 1

For INTENSITY or TEXTURE features, which image's measurements would you like to use? RawBrightfield  
Which object would you like to use for the denominator? Image  
Which category of measurements would you like to use? AreaOccupied\_WormArea  
Which feature do you want to use? (Enter the feature number - see help for details) 1  
For INTENSITY or TEXTURE features, which image's measurements would you like to use? RawBrightfield  
Do you want the log (base 10) of the ratio? No

Module #30: ExportToExcel

Which objects do you want to export? Image

## Supplementary Method 2. Liquid Chromatography Mass Spectrometry

Tandem high performance liquid chromatography/mass spectral (LC/MS) analyses were performed on a Waters Corporation 3100 Mass Detector in positive and negative electrospray ionization (ESI) mode after separation on a Waters separation module (2545 Binary Gradient Module). The actual separations were performed on a Waters Xterra column C18 (5 $\mu$ m, 4.6 x 50 mm) with a flow rate of 5 mL/min and a 2 min gradient of 5-100% CH<sub>3</sub>CN in H<sub>2</sub>O, with a constant 0.1% formic acid buffer. Elution chromatograms were acquired using a Waters 2998 photodiode array (PDA) detector monitoring 200-400nm. Purity was determined by integration at 214nm.
